# Supplementary material for: Crowded Nests: Parent–Adult Child Coresidence Transitions and Parental Mental Health Following the Great Recession
Source: PubMed Central journal article supplement (PMC6573002; doi:10.1177/0022146519849113), 2019-05-23
Supplement: 849113_supp_mat.pdf [file 849113_supp_mat.pdf]

**Supplemental Table 1.** Means (and Standard Deviations) of Study Variables by Beneficiary of Move among Parents with a New Coresident Adult Child in the 2010 Wave of the Health and Retirement Study ( $N = 523$ )

|                                   | Helped child<br>( $N = 262$ ) | Helped parent<br>( $N = 58$ ) | Helped both<br>( $N = 198$ ) | Other<br>( $N = 11$ ) |
|-----------------------------------|-------------------------------|-------------------------------|------------------------------|-----------------------|
| Depressive symptoms 2012 (0–8)    | 1.65<br>(2.12)                | 2.50*<br>(2.22)               | 1.96<br>(2.19)               | 2.18<br>(2.79)        |
| Depressive symptoms 2008 (0–8)    | 1.45<br>(2.09)                | 2.40*<br>(2.37)               | 1.81<br>(2.16)               | 1.82<br>(2.75)        |
| Functional limitations 2008 (0–5) | .24<br>(.76)                  | .62*<br>(1.04)                | .35<br>(.93)                 | .18<br>(.40)          |
| <i>Female (%)</i>                 | 64.89                         | 74.14                         | 75.25*                       | 63.64                 |
| Age 2010 (38–96)                  | 66.13<br>(7.83)               | 75.64*<br>(10.30)             | 69.28*<br>(10.19)            | 72.18*<br>(8.82)      |
| <i>U.S. census region (%)</i>     |                               |                               |                              |                       |
| Northeast                         | 9.54                          | 13.79                         | 13.13                        | 18.18                 |
| Midwest                           | 25.19                         | 12.07*                        | 13.64*                       | 18.18                 |
| South                             | 40.08                         | 46.55                         | 44.95                        | 36.36                 |

Mental Health & Newly Coresidential Adult Children 2

|                                  |        |        |        |        |
|----------------------------------|--------|--------|--------|--------|
| West                             | 25.19  | 27.59  | 28.28  | 27.27  |
| <i>Race-ethnicity (%)</i>        |        |        |        |        |
| White                            | 62.60  | 51.72  | 45.45* | 45.45  |
| African American                 | 19.85  | 20.69  | 28.79* | 45.45* |
| Hispanic                         | 16.79  | 20.69  | 20.20  | 9.09   |
| Other                            | .76    | 6.90*  | 5.56*  | .00    |
| Years of education (0–17)        | 12.23  | 10.97* | 11.11* | 13.55  |
|                                  | (3.26) | (3.92) | (3.66) | (3.33) |
| <i>Household income 2010 (%)</i> |        |        |        |        |
| 1 <sup>st</sup> quartile         | 22.52  | 67.28* | 50.51* | 18.18  |
| 2 <sup>nd</sup> quartile         | 25.57  | 22.41  | 28.28  | 36.36  |
| 3 <sup>rd</sup> quartile         | 22.90  | 5.17*  | 14.14* | 9.09   |
| 4 <sup>th</sup> quartile         | 29.01  | 5.17*  | 7.07*  | 36.36  |
| Employed 2010 (%)                | 40.84  | 8.62*  | 29.80* | 27.27  |
| <i>Marital status 2010 (%)</i>   |        |        |        |        |
| Married/partnered                | 66.79  | 18.97* | 29.80* | 45.45  |
| Separated/divorced               | 13.36  | 25.86* | 20.71* | 18.18  |

Mental Health & Newly Coresidential Adult Children 3

|                                                            |        |        |        |        |
|------------------------------------------------------------|--------|--------|--------|--------|
| Widowed                                                    | 19.08  | 53.45* | 45.96* | 27.27  |
| Never married                                              | .76    | 1.72   | 3.54*  | 9.09*  |
| Number of adult children 2010 (1–14)                       | 4.11   | 4.90*  | 4.64*  | 4.09   |
|                                                            | (2.26) | (2.70) | (2.50) | (1.70) |
| <i>Characteristics of new coresidential child(ren) (%)</i> |        |        |        |        |
| Age 35+                                                    | 60.69  | 86.21* | 65.15  | 81.82  |
| Not employed                                               | 41.22  | 39.66  | 38.38  | 45.45  |
| Not partnered                                              | 70.23  | 46.55* | 72.22  | 63.64  |
| Nonparent                                                  | 39.31  | 27.59  | 32.32  | 36.36  |
| <i>Type of coresidential move (%)</i>                      |        |        |        |        |
| Child moved                                                | 90.46  | 24.14* | 72.50* | 63.64* |
| Parent moved                                               | .76    | 65.52* | 20.71* | 18.18* |
| Both/other type of move                                    | 9.92   | 12.07  | 8.59   | 27.27  |

---

\* Significantly different from those reporting the move benefited their child  $p < .05$ , two-tailed tests.

**Supplemental Table 2.** Coefficients from Ordinary Least Squares Regressions of Depressive Symptoms in 2012 on Adult Child Characteristics among Parents without Coresidential Adult Children 2009–2010 ( $N = 8,476$ )

|                                                          | Model 1        | Model 2        | Model 3         | Model 4         |
|----------------------------------------------------------|----------------|----------------|-----------------|-----------------|
| 1+ child age 35+ ( <i>all children age 18–34</i> )       | .016<br>(.022) |                |                 |                 |
| 1+ child not employed ( <i>all children employed</i> )   |                | .048<br>(.038) |                 |                 |
| 1+ child not partnered ( <i>all children partnered</i> ) |                |                | .089*<br>(.038) |                 |
| 1+ child nonparent ( <i>all children parents</i> )       |                |                |                 | –.004<br>(.036) |

*Note.* All models control for depressive symptoms and functional limitations in 2008, gender, age in 2010, race-ethnicity, education, and income, work status, marital status, and number of adult children in 2010.

\*\*\* $p < .001$ , \*\* $p < .01$ , \* $p < .05$
